# Supplementary material
Source: publisher figshare collection journal article supplement (https://karger.figshare.com/articles/dataset/_/5777412)
Supplement: Supplementary file 1 [file 1]

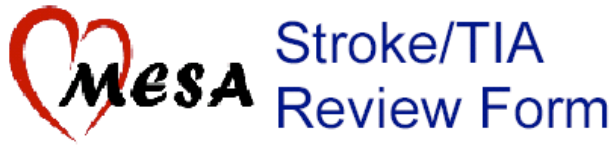

**Participant + Investigation  
ID:**

Type of Review:

- ☒ First review
- ☐ Final (consensus)

☐ Check here if no event or revascularization and skip to section 7.

## 1. Criteria

### A. Symptoms and Signs

- ☐ Non-focal symptoms, such as headache
- ☐ Focal neurologic deficit lasting < 24 hours
- ☐ Focal neurological deficits lasting until death or  $\geq$  24 hours
- ☐ Unknown

### B. Clinically relevant lesion on brain imaging

- ☐ Subarachnoid Hemorrhage (SAH) (go to 1c)
- ☐ Intraparenchymal Hemorrhage (IPH) (go to 1c)
- ☐ Both SAH and IPH (go to 1c)
- ☐ Brain Infarction (bland or bloody) (skip to 2)
- ☐ No clinically relevant lesion (skip to 2)
- ☐ Results unknown or no brain imaging done (skip to 2)

### C. If hemorrhage, please specify origin:

(If hypertensive hemorrhage suspected, mark "Unknown.")

- ☐ AVM
- ☐ Aneurysm
- ☐ Specify:
- ☐ Unknown

## 2. Primary Diagnosis

- ☐ Not a TIA or stroke (skip to 7)
- ☐ TIA (skip to 7)
- ☐ Stroke

## 3. Stroke Type

### A. Type:

- ☐ Subarachnoid Hemorrhage
- ☐ Intraparenchymal Hemorrhage
- ☐ Other Hemorrhage
- ☐ Brain Infarction
- ☐ Other Stroke Type
- ☐ Unknown Stroke Type

### B. Procedure-related?

- ☐ Yes   ☐ No

If yes, please specify:

## 4. Location - record using 2 digit codes below:

A. Primary Location:

B. Other Locations:

### C. Are more than five sites indicated?

- ☐ Yes   ☐ No

Codes:

| <u>Left</u>                                                 | <u>Right</u> |
|-------------------------------------------------------------|--------------|
| 01 Cerebral Hemisphere                                      | 02           |
| 03 Frontal Lobe                                             | 04           |
| 05 Parietal                                                 | 06           |
| 07 Insular-operculum                                        | 08           |
| 09 Occipital lobe                                           | 10           |
| 11 Temporal lobe                                            | 12           |
| 13 Basal ganglion                                           | 14           |
| 15 Thalamus                                                 | 16           |
| 17 Internal capsule / corona radiata /<br>centrum semiovale | 18           |
| 19 Cerebellum                                               | 20           |
| 21 Fronto-parietal lobe                                     | 22           |
| 23 Parietal-occipital lobe                                  | 24           |
| 25 Temporo-parietal lobe                                    | 26           |
| 27 Temporo-occipital lobe                                   | 28           |
| 29 Fronto-temporo-parietal lobe                             | 30           |
| 31 Basal ganglia and capsule                                | 32           |
| 41 Retina                                                   | 42           |
| 33 Midline (third ventricular callosum)                     |              |
| 34 Intracranial (not further specified)                     |              |
| 35 Brain stem                                               |              |
| 36 Midbrain                                                 |              |
| 37 Pons                                                     |              |
| 38 Medulla                                                  |              |
| 39 Subarachnoid space                                       |              |
| 40 Intraventricular space                                   |              |
| 99 Unknown                                                  |              |

**5. Vascular Territory - record using 2 digit codes below:**

A. Primary Vascular Territory:

B. Other Vascular Territories:

**C. Are more than five vascular territories indicated?**

☐ Yes    ☐ No

Codes:

| <u>Left</u>                               | <u>Right</u> |
|-------------------------------------------|--------------|
| 20 Common Carotid                         | 50           |
| 21 External Carotid                       | 51           |
| 22 Internal Carotid                       | 52           |
| 23 ...At bifurcation                      | 53           |
| 24 ...Distal extracranial                 | 54           |
| 25 ...Intracranial                        | 55           |
| 26 ...Junction of posterior communicating | 56           |
| 27 ...Other                               | 57           |
| 28 Anterior cerebral                      | 58           |
| 29 ...Junction of anterior communicating  | 59           |
| 30 ...Other                               | 60           |
| 31 Middle cerebral                        | 61           |
| 32 ...Penetrating or lenticulostriate     | 62           |
| 33 ...Stem                                | 63           |
| 34 ...Upper branch                        | 64           |
| 35 ...Lower branch                        | 65           |
| 36 Posterior communicating                | 66           |
| 37 Posterior cerebral                     | 67           |
| 38 ...Penetrating                         | 68           |
| 39 ...Stem                                | 69           |
| 40 ...Calcarine branch                    | 70           |
| 41 Superior cerebellar                    | 71           |
| 42 Posterior inferior cerebellar          | 72           |
| 43 Vertebral                              | 73           |
| 44 Subclavian                             | 74           |
| 45 Anterior choroidal                     | 75           |
| 46 Ophthalmic                             | 76           |
| 80 Anterior communicating                 |              |
| 81 Basilar                                |              |
| 82 ...Penetrating                         |              |
| 83 ...Full                                |              |
| 84 ...Upper branch                        |              |
| 85 ...Lower branch                        |              |
| 86 Innominate                             |              |
| 99 Unknown                                |              |

If Stroke Type is not Brain Infarction, skip to 7.

#### 6. Brain infarct subtypes:

All three boxes need not be filled.

- ☐ First choice of Subtype (reflection of strict adherence to the algorithm)
- ☐ Second choice of Subtype (allows for some loosening of the criteria and is an attempt to reduce the number of cases classified as "Unknown")
- ☐ Third choice of Subtype (to be completed only if 'First choice of subtype' is '7: more than one etiology' – This box should contain the second of the two selected etiologies)

Choices:

- 1 - Large vessel extracranial atheroembolic
- 2 - Large vessel intracranial atheroembolic
- 3 - Cardioembolic
- 4 - Small vessel (lacunae)
- 5 - Acute ischemic stroke of other known etiology
- 6 - Ischemic stroke of unknown cause (no probable etiology despite complete workup)
- 7 - Ischemic stroke of unknown cause (more than one etiology)
- 8 - Ischemic stroke of unknown cause (workup is incomplete)

**Complete question 7 for all diagnoses.**

7. Did the patient die?

☐ Yes ☐ No

If the cause of death is stroke, the stroke reviewer(s) will fill out the Mortality Review Form. For all other causes of death, the cardiac reviewer(s) will fill out the Mortality Review Form. Is stroke the cause of death?

☐ Yes ☐ No ☐ Cancel

Reviewing Physician's ID:

Date:

Data Entry ID:

Reviewer Comments:
