# Supplementary material
Source: publisher figshare collection journal article supplement (https://karger.figshare.com/articles/dataset/_/5777412)
Supplement: Supplementary file 2 [file 1 › 486174_sm2.pdf]

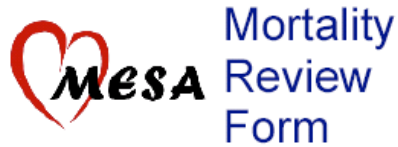**Participant + Investigation ID:**

Type of Review:

- ☐ Local (Field Center review)
- ☐ Central (other committee member review)
- ☐ Final (consensus)
- ☐ Committee

**All Deaths****1. Location of death:**

- ☐ Out-of-Hospital
- ☐ Emergency Room (not DOA)
- ☐ In Hospital
- ☐ Nursing Home, SNF, or ECF
- ☐ Other, specify:

**2. Was the death witnessed?**

- ☐ Yes
- ☐ No

**3. MESA classification of underlying cause of death (choose one)**

- ☐ Atherosclerotic coronary heart disease (complete questions 4-7 only)
- ☐ Stroke (complete questions 8-9 only)
- ☐ Atherosclerotic disease other than coronary disease or stroke (specify):  
 (complete questions 6 & 7 only)
- ☐ Other cardiovascular disease, not defined above (specify):  
 (complete questions 6 & 7 only)
- ☐ Non-cardiovascular disease (specify):  
 (skip to end of form)

**Coronary Heart Disease (CHD) Deaths****4. Type of fatal coronary heart disease:**

- ☐ Definite fatal MI (no known non-atherosclerotic cause and definite MI within 4 weeks of death)
- ☐ Definite fatal CHD (no known non-atherosclerotic cause, and one or both of the following: chest pain within 72 hours of death or a history of chronic ischemic heart disease)
- ☐ Possible fatal CHD (no known non-atherosclerotic cause, and death certificate underlying cause: I20-25, I46, I51.6, R96 or R98-99)

**5. Estimated time between onset of acute cardiac symptoms and death:**

- ☐ Less than 5 minutes
- ☐ 5 minutes to 1 hour
- ☐ 1 hour to 24 hours
- ☐ More than 24 hours
- ☐ Unknown

(Continue to question 6.)

**Cardiovascular Death (including CHD)****6. Mechanism of death in patients dying of cardiovascular causes (check all that apply):**

- ☐ Primary arrhythmic death
- ☐ Secondary arrhythmic/mechanical death
- ☐ Congestive heart failure (CHF)
- ☐ Cardiac procedure such as CABG or angioplasty
- ☐ Hemorrhage from thrombolytic therapy
- ☐ Non-cardiovascular disease (specify):
- ☐ Unknown or Uncertain

**7. Treatment or procedure-related:**

- ☐ Yes, cardiovascular (specify):
- ☐ Yes, non-cardiovascular (specify):
- ☐ No

(Skip to End and submit.)

**Stroke Death**

8. Estimated time between onset of acute stroke symptoms and death:

- ☐ Less than 5 minutes
- ☐ 5 minutes to 1 hour
- ☐ 1 hour to 24 hours
- ☐ 1 day to 1 week
- ☐ 1 week to 1 month
- ☐ Longer than one month

9. Mechanism of stroke death (check all that apply):

- ☐ Critical Brain injury
- ☐ Infection
- ☐ Pulmonary Embolus
- ☐ Other:

- ☐ Unknown

Reviewer ID:  Date:  Data Entry ID:

Reviewer Comments:

**Reset** Click on Reset if you would like to cancel and restart.

**Submit** Click Submit to enter this review.

**Investigations** Click here to return to list of Investigations Needing Review without submitting review

**Send Comment** Click here to send comments.

If this review cannot be completed due to missing information, pre-baseline conditions, or other issues, please enter your comments in the Reviewer Comments field and press the 'Send Comments' button. Your comments will be forwarded to the CC Events Coordinator.
